---

Corrigendum

## Using combined evidence from replicates to evaluate ChIP-seq peaks

Vahid Jalili, Matteo Matteucci, Marco Masseroli and Marco J. Morelli

---

*Bioinformatics* (2015) <https://doi.org/10.1093/bioinformatics/btv293>

The authors of the above paper wish to inform readers that the source code for the project has been migrated from CodePlex to

Github. The correct link to access the source code is: <https://github.com/Genometric/MSPC>. The paper has now been corrected online.
